# Supplementary material
Source: PubMed Central journal article supplement (PMC3487622)

**Supplementary Figure 1.** (a) INSL3 binding to, and cell surface expression of, chimeric extracellular domain (ECD) only receptors expressed in HEK-293T cells. (b) Eu-H2 relaxin binding to and cell surface expression of, chimeric extracellular domain (ECD) only receptors expressed in HEK-293T cells. (c) INSL3 binding to, and cell surface expression of, ECD-1 mutants containing the individual substitutions that comprise ECD-1<sup>2β1</sup>. These data were used to calculate the ratio of specific Eu-INSL3 binding to the cell surface expression of each construct as displayed in Figure 2 (a, b and d).

# Supplementary Figure 1

**a**

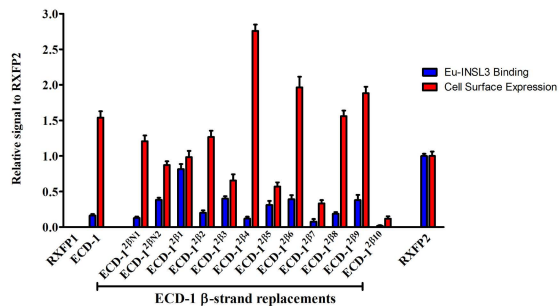

**b**

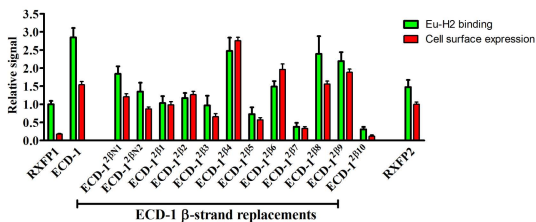

**c**

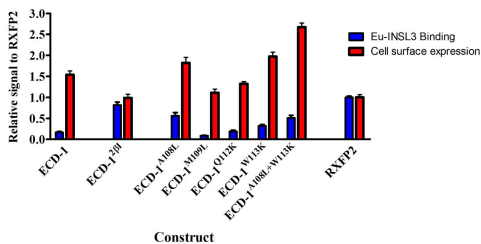

Supplement: supp_me.2012-1188_me-12-1188.pdf [file supp_me.2012-1188_me-12-1188.pdf]
